# Supplementary material for: Highly efficient and stable hydrodechlorination of chlorophenols in a flow Pd–Ce/SiO2/Ni foam reactor
Source: Royal Society of Chemistry journal article supplement (doi:10.1039/d3nj01468a), 2023-01-01
Supplement: d3nj01468a1.pdf [file d3nj01468a1.pdf]

## ***Supporting Information***

### **Highly efficient and stable hydrodechlorination of chlorophenols in flow Pd-Ce/SiO<sub>2</sub>/Ni foam reactor**

Ruijie Cheng, Linyu Li, Lizhi Tan, Haozhen Feng, Guangyan Xiang, Jun Xiong\*

Department of Pharmaceutical Engineering, School of Pharmacy and Key  
Laboratory of Basic Pharmacology of Guizhou Province, Zunyi Medical University,  
Zunyi, Guizhou, 563000, China

\* Corresponding author. Tel: +86 0851 28642341

E-mail: [xiongjun@zmu.edu.cn](mailto:xiongjun@zmu.edu.cn) (J. Xiong)

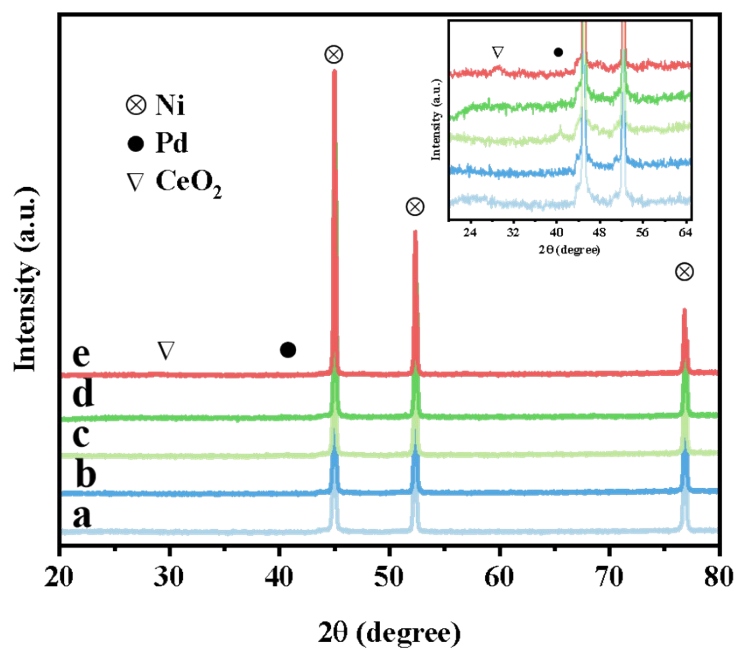

**Fig. S1:** XRD patterns of Ni foam (a),  $\text{SiO}_2/\text{Ni}$  foam (b), Pd/Ni foam (c), Pd/ $\text{SiO}_2$ /Ni foam (d) and Pd-Ce/ $\text{SiO}_2$ /Ni foam (e).

## External and internal mass transfer in flow Pd-based Ni foam reactor

### External mass transfer limitation

The dimensionless Carberry numbers, defined as the ratio between the observed reaction rate ( $r_{obs}$ ) and the maximum transfer rate of the reactants were calculated to evaluate the external mass transfer limitation. The overall gas–liquid mass transfer coefficient between the rather insoluble H<sub>2</sub> gas and water is approximately equal to the liquid-side mass transfer coefficient, because the gas phase mass transfer resistance is far less than the liquid phase mass transfer resistance [1]. Therefore, the Carberry numbers for gas-liquid ( $Ca_{G-L}$ ) and liquid-solid ( $Ca_{L-S}$ ) mass transport are expressed as follows [2,3]:

$$Ca_{G-L} = \frac{r_{obs}}{(k_L a_{GL}) C^*}$$

$$Ca_{L-S} = \frac{r_{obs}}{(k_{LS} a_{LS}) C_b}$$

The value of the gas-liquid mass transfer coefficient ( $k_L a_{GL}$ ) was estimated by the correlation consisting of Sherwood ( $Sh$ ), Reynolds ( $Re$ ) and Schmidt ( $Sc$ ) numbers [1]:

$$\frac{a_{GL} \varepsilon_L}{a_p} Sh = 0.0037 Re_L^{1.4} Sc_L^{0.5}$$

$$Sh = \frac{k_L d_p}{D}$$

$$Re_L = \frac{d_p u_L \rho_L}{\mu_L}$$

$$Sc_L = \frac{\mu_L}{\rho_L D}$$

Where  $a_{GL}$  is the interfacial gas-liquid area per unit volume of liquid,  $k_L$  is the liquid side mass transfer coefficient,  $\varepsilon_L$  is the liquid hold-up, measured by the method reported previously[1],  $a_p$  is the specific surface area of foam bed (per unit of bed volume),  $d_p$  is the characteristic length of the foam bed,  $\rho_L$  is the liquid density,  $\mu_L$  is the liquid viscosity,  $u_L$  is the liquid superficial velocity,  $D$  is the diffusion coefficients evaluated by Wilke-Chang equation [4]:

$$D = 7.4 \times 10^{-8} \frac{(\varphi M_L)^{0.5} T}{\mu_L V_i^{0.6}}$$

Where the volumes of hydrogen and 4-chlorophenol in water at normal boiling temperature ( $V_i$ ) are 14.3 and 123 cm<sup>3</sup>/mol, respectively,  $\varphi$  is association factor (2.6 for water),  $M_L$  is the molecular weight of water.

To determine the liquid-solid mass transfer coefficient ( $k_{LS}$ ) in solid foam, Mohammed et al proposed a modified correlation that considers gas and liquid superficial velocities, fluids physical properties and foam geometric features. A good agreement between the experimental result and predicated data was obtain, for the liquid-solid mass transfer coefficient calculation of polyurethane foam [5]. In this work, the liquid-solid mass transfer coefficient ( $k_{LS}$ ), in terms of Sherwood number, was also estimated by the correlation mentioned above.

$$\frac{\theta Sh}{Sc_L^{0.33}} = 0.13 Re_L^{0.805} Re_G^{-0.89} \left( \alpha_p d_p \frac{1 - \varepsilon}{\varepsilon} \right)^{-1.34}$$

Where  $\theta$  is the wetting efficiency of solid surface,  $\alpha_p$  is the specific surface area of foam bed (per unit of bed volume),  $d_p$  is the characteristic length of the foam bed,  $\varepsilon$  is the porosity of foam. The wetting efficiency of solid surface is approximately equal to 100 %, because the liquid flow regime under experimental condition is similar to the typical low liquid holdup trickle flow with high gas-liquid interaction [6,7].

**Table S1.** Estimated Carberry (Ca) numbers of hydrogen and 4-CP during HDC in flow foam reactor

| T(°C) | Pd/Ni foam           |                      |                      | Pd/SiO <sub>2</sub> /Ni foam |                      |                      | Pd-Ce/SiO <sub>2</sub> /Ni foam |                      |                      |
|-------|----------------------|----------------------|----------------------|------------------------------|----------------------|----------------------|---------------------------------|----------------------|----------------------|
|       | Ca <sub>L-S</sub>    |                      |                      | Ca <sub>L-S</sub>            |                      |                      | Ca <sub>L-S</sub>               |                      |                      |
|       | Ca <sub>G-L</sub>    | H <sub>2</sub>       | 4-CP                 | Ca <sub>G-L</sub>            | H <sub>2</sub>       | 4-CP                 | Ca <sub>G-L</sub>               | H <sub>2</sub>       | 4-CP                 |
| 20    | 1.3×10 <sup>-3</sup> | 2.6×10 <sup>-5</sup> | 6.9×10 <sup>-5</sup> | 1.5×10 <sup>-4</sup>         | 1.2×10 <sup>-4</sup> | 3.1×10 <sup>-4</sup> | 9.2×10 <sup>-5</sup>            | 1.6×10 <sup>-4</sup> | 4.3×10 <sup>-4</sup> |
| 40    | 3.9×10 <sup>-3</sup> | 1.1×10 <sup>-4</sup> | 6.4×10 <sup>-5</sup> | 2.7×10 <sup>-4</sup>         | 3.2×10 <sup>-4</sup> | 1.8×10 <sup>-4</sup> | 1.6×10 <sup>-4</sup>            | 4.0×10 <sup>-4</sup> | 2.3×10 <sup>-4</sup> |
| 60    | 1.9×10 <sup>-3</sup> | 1.5×10 <sup>-4</sup> | 8.3×10 <sup>-5</sup> | 1.2×10 <sup>-4</sup>         | 3.9×10 <sup>-4</sup> | 2.2×10 <sup>-4</sup> | 7.2×10 <sup>-5</sup>            | 5.0×10 <sup>-4</sup> | 2.8×10 <sup>-4</sup> |

Reaction conditions: gas-liquid volume ratio (4:1), total gas-liquid flow rate (5 mL·min<sup>-1</sup> at 20 and 40 °C, 10 mL·min<sup>-1</sup> at 60 °C), 4-CP inlet concentration (10 mmol·L<sup>-1</sup>).

### Internal mass transfer limitation

The significance of internal mass transfer limitation was evaluated from the application of the Weisz-Prater criterion ( $\Phi$ ) [4]:

$$\Phi = L_p^2 \frac{r_{obs}}{D_e C^*}$$

Where ( $D_e$ ) is the effective diffusivity estimated to be 0.1  $D$  in the absence of the tortuosity factor [2, 4].  $L_p$  is the thickness of the active layer, corresponding to 1/6 the Pd particle diameter for Pd/Ni foam and the thickness of the coating Pd layer for Pd/SiO<sub>2</sub>/Ni foam and Pd-Ce/SiO<sub>2</sub>/Ni foam [3].

**Table S2.** Estimated Weisz-Prater criterions ( $\Phi$ ) of hydrogen and 4-CP during HDC in flow foam reactor

| T(°C) | Pd/Ni foam             |                        | Pd/SiO <sub>2</sub> /Ni foam |                        | Pd-Ce/SiO <sub>2</sub> /Ni foam |                        |
|-------|------------------------|------------------------|------------------------------|------------------------|---------------------------------|------------------------|
|       | H <sub>2</sub>         | 4-CP                   | H <sub>2</sub>               | 4-CP                   | H <sub>2</sub>                  | 4-CP                   |
| 20    | 3.8 × 10 <sup>-9</sup> | 3.3 × 10 <sup>-8</sup> | 3.2 × 10 <sup>-6</sup>       | 2.8 × 10 <sup>-5</sup> | 3.6 × 10 <sup>-6</sup>          | 3.1 × 10 <sup>-5</sup> |
| 40    | 4.0 × 10 <sup>-8</sup> | 3.5 × 10 <sup>-8</sup> | 2.1 × 10 <sup>-5</sup>       | 1.9 × 10 <sup>-5</sup> | 2.2 × 10 <sup>-5</sup>          | 1.9 × 10 <sup>-5</sup> |
| 60    | 5.6 × 10 <sup>-8</sup> | 4.9 × 10 <sup>-8</sup> | 2.8 × 10 <sup>-5</sup>       | 2.4 × 10 <sup>-5</sup> | 2.9 × 10 <sup>-5</sup>          | 2.5 × 10 <sup>-5</sup> |

Reaction conditions: gas-liquid volume ratio (4:1), total gas-liquid flow rate (5 mL·min<sup>-1</sup> at 20 and 40 °C, 10 mL·min<sup>-1</sup> at 60 °C), 4-CP inlet concentration (10 mmol·L<sup>-1</sup>).

### Parameters of flow Pd-based Ni foam reactor under experimental conditions

**Table S3.** Parameters of flow Pd-based Ni foam reactor

|                                 | Pore density (ppi) | $\varepsilon$ | $d_p$ (m)              | $\alpha_p$ (m <sup>2</sup> ·m <sup>-3</sup> ) | $\varepsilon_L$ | $L_p$ (m)              |
|---------------------------------|--------------------|---------------|------------------------|-----------------------------------------------|-----------------|------------------------|
| Pd/Ni foam                      | 110                | 0.97          | 3.7 × 10 <sup>-4</sup> | 5.4 × 10 <sup>5</sup>                         | 0.34            | 1.8 × 10 <sup>-8</sup> |
| Pd/SiO <sub>2</sub> /Ni foam    | 110                | 0.97          | 3.7 × 10 <sup>-4</sup> | 1.0 × 10 <sup>7</sup>                         | 0.43            | 4 × 10 <sup>-6</sup>   |
| Pd-Ce/SiO <sub>2</sub> /Ni foam | 110                | 0.97          | 3.7 × 10 <sup>-4</sup> | 1.8 × 10 <sup>7</sup>                         | 0.44            | 4 × 10 <sup>-6</sup>   |

## References

- [1] R.R. Zapico, P. Marín, F.V. Díez, S. Ordóñez, Liquid hold-up and gas-liquid mass transfer in analumina open-cell foam, *Chem. Eng. Sci.* 143 (2016) 297–304. <http://dx.doi.org/10.1016/j.ces.2016.01.008>.
- [2] E. Crezee, B.W. Hoffer, R.J. Berger, M. Makkee, F. Kapteijn, J.A. Moulijn, Three-phase hydrogenation of d-glucose over a carbon supported ruthenium catalyst-mass transfer and kinetics, *Applied Catalysis A: General* 251 (2003) 1-17. [https://doi.org/10.1016/S0926-860X\(03\)00587-8](https://doi.org/10.1016/S0926-860X(03)00587-8).
- [3] Y. Zhao, J. Zhou, J. Zhang, D. Li, S. Wang, Selective hydrogenation of benzene to cyclohexene on a Ru/Al<sub>2</sub>O<sub>3</sub>/cordierite monolithic catalyst: Effect of mass transfer on the catalytic performance, *Ind. Eng. Chem. Res.* 47, (2008) 4641-4647. <https://doi.org/10.1021/ie071574g>.
- [4] E. Díaz, J.A. Casas, Á.F. Mohedano, L. Calvo, M.A. Gilarranz, J.J. Rodríguez, Kinetics of 4-chlorophenol hydrodechlorination with alumina and activated carbon-supported Pd and Rh catalysts, *Ind. Eng. Chem. Res.* 48 (2009) 3351-3358. <https://doi.org/10.1021/ie801462b>.
- [5] I. Mohammed, T. Bauer, M. Schubert, R. Lange, Liquid-solid mass transfer in a tubular reactor with solid foam packings, *Chem. Eng. Sci.* 108 (2014) 223-232. <http://dx.doi.org/10.1016/j.ces.2013.12.016>.
- [6] R. Joubert, W. Nicol, Trickle flow liquid-solid mass transfer and wetting efficiency in small diameter columns, *Can. J. Chem. Eng.* 9999 (2012) 1-7. <http://dx.doi.org/10.1002/cjce.21668>.
- [7] C.P Stemmet, J. Van der Schaaf, B.F.M. Kuster, J.C. Schouten, Solid foam packings for multiphase reactors: Modelling of liquid holdup and mass transfer, *Chem. Eng. Res. Des.* 84 (2006) 1134-1141. <http://dx.doi.org/10.1205/cherd05034>.

## Nomenclature

$Ca_{G-L}$  Carberry number for gas-liquid mass transport

$Ca_{L-S}$  Carberry number for liquid-solid mass transport

$\Phi$  Weisz-Prater parameter

$Sh$  Sherwood number

$Sc$  Schmidt number

$Re$  Reynolds number

$D$  diffusion coefficient ( $m^2 \cdot s^{-1}$ )

$De$  effective diffusion coefficient ( $m^2 \cdot s^{-1}$ )

$k_L \alpha_{GL}$  gas-liquid mass transfer coefficient ( $s^{-1}$ )

$k_{LS}$  liquid to solid mass transfer coefficient ( $m \cdot s^{-1}$ )

$C^*$  equilibrium concentration ( $mmol \cdot L^{-1}$ )

$C_b$  bulk concentration ( $mmol \cdot L^{-1}$ )

$r_{obs}$  observed reaction rate ( $mmol \cdot L^{-1} \cdot s^{-1}$ )

$\mu$  viscosity ( $Pa \cdot s$ )

$\rho$  density ( $kg \cdot m^{-3}$ )

$u$  superficial velocity ( $m \cdot s^{-1}$ )

$\varepsilon_L$  liquid hold-up ( $m^3_{liquid} \cdot m^{-3}_{bed}$ )

$\alpha_p$  the specific surface area of foam bed ( $m^2 \cdot m^{-3}$ )

$d_p$  the characteristic length of the foam bed (m)

$\varphi$  association factor, 2.6 for water

$V_i$  volume of species i in water at its normal boiling temperature

$M$  molecular weight ( $g \cdot mol^{-1}$ )

$T$  temperature (K)

$\Theta$  wetting efficiency of solid foam surface

$\varepsilon$  porosity of foam.

$L_p$  thickness of the active layer (m)

L liquid phase

G gas phase

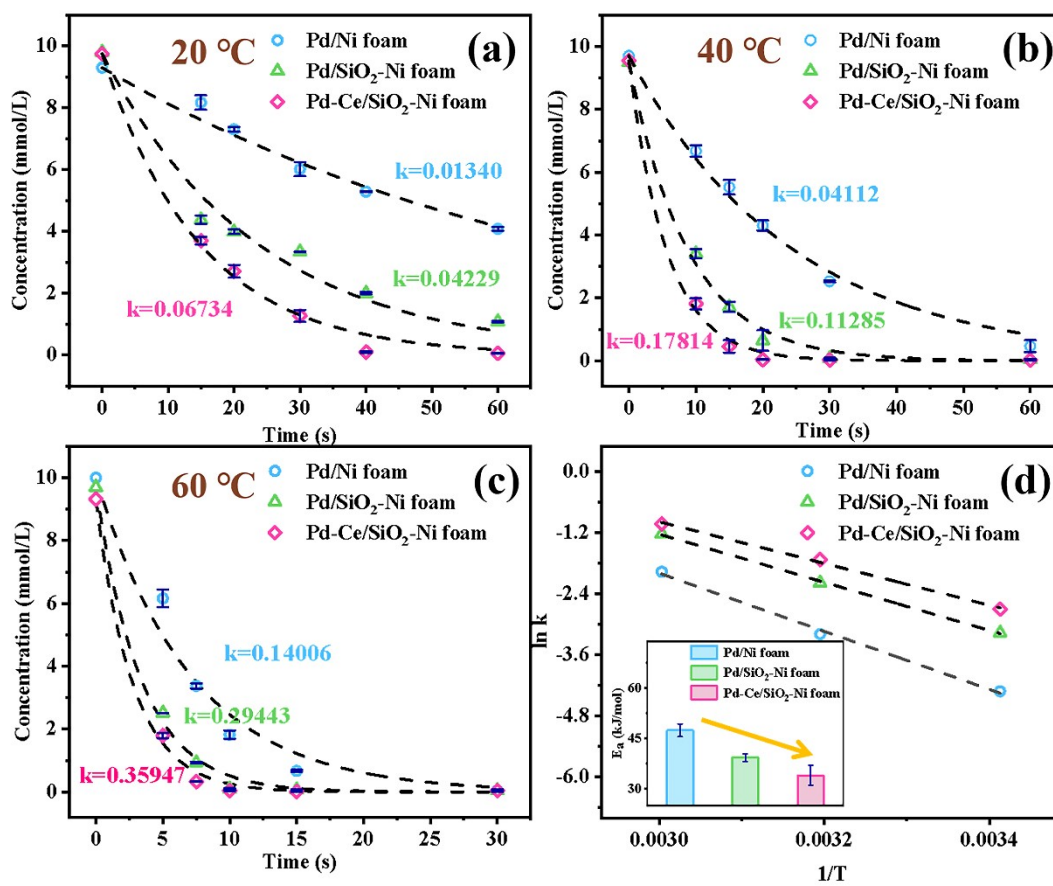

**Fig. S2** Concentration-time curves of 4-CP at 20 °C (a), 40 °C (b) and 60 °C (c), and Arrhenius plots of 4-CP (d) during HDC in flow Pd-based Ni foam reactor. Experimental (symbols) and predicted (dash lines) values. Reaction conditions: gas-liquid volume ratio (4:1), 4-CP inlet concentration (10 mmol·L<sup>-1</sup>).



**Table S4.** HDC of 4-CP in flow Pd-Ce/SiO<sub>2</sub>/Ni foam reactor

| Entry | 4-CP <sub>inlet</sub><br>concentration<br>(mmol·L <sup>-1</sup> ) | Total flow rate<br>(mL·min <sup>-1</sup> ) | Residence<br>time (s) | Conversion<br>(%) | 4-CP <sub>outlet</sub><br>concentration<br>(ppm) |
|-------|-------------------------------------------------------------------|--------------------------------------------|-----------------------|-------------------|--------------------------------------------------|
| 1     | 10                                                                | 20                                         | 15                    | 59.52%            | 475.85                                           |
| 2     | 10                                                                | 15                                         | 20                    | 72.29%            | 348.49                                           |
| 3     | 10                                                                | 10                                         | 30                    | 85.95%            | 162.93                                           |
| 4     | 10                                                                | 5                                          | 60                    | 99.33%            | 10.11                                            |
| 5     | 10                                                                | 2.5                                        | 120                   | 99.45%            | 9.93                                             |
| 6     | 20                                                                | 5                                          | 60                    | 91.15%            | 182.25                                           |
| 7     | 5                                                                 | 5                                          | 60                    | 99.69%            | 2.06                                             |
| 8     | 1                                                                 | 5                                          | 60                    | 99.57%            | 0.62                                             |
| 9     | 0.2                                                               | 5                                          | 60                    | 99.01%            | 0.36                                             |

Reaction conditions: reaction temperature (20 °C), gas-liquid volume ratio (4:1).
